# Supplementary material for: Shallow slip amplification and enhanced tsunami hazard unravelled by dynamic simulations of mega-thrust earthquakes
Source: PubMed Central journal article supplement (PMC5057117; doi:10.1038/srep35007), 2016-10-11
Supplement: srep35007-s1.pdf [file srep35007-s1.pdf]

1 Supplementary Information to: **Shallow slip amplification and enhanced tsunami**  
2 **hazard unravelled by dynamic simulations of mega-thrust earthquakes**

3

4 S. Murphy\*<sup>1</sup>, A. Scala<sup>2,3</sup>, A. Herrero<sup>1</sup>, S. Lorito<sup>1</sup>, G. Festa<sup>2</sup>, E. Trasatti<sup>1</sup>, R. Tonini<sup>1</sup>, F.  
5 Romano<sup>1</sup>, I. Molinari<sup>4</sup>, S. Nielsen<sup>5</sup>

6 <sup>1</sup>Istituto Nazionale di Geofisica e Vulcanologia, Via di Vigna Murata, 00143 Rome,  
7 Italy

8 <sup>2</sup>Università degli Studi di Napoli Federico II, Naples, Italy

9 <sup>3</sup>Institut de Physique du Globe de Paris, France

10 <sup>4</sup>ETH Zürich, Switzerland

11 <sup>5</sup>Durham University, United Kingdom

12 \*shane.murphy@ingv.it

13

14

15

16

17

18

19

20

21

22

23

24

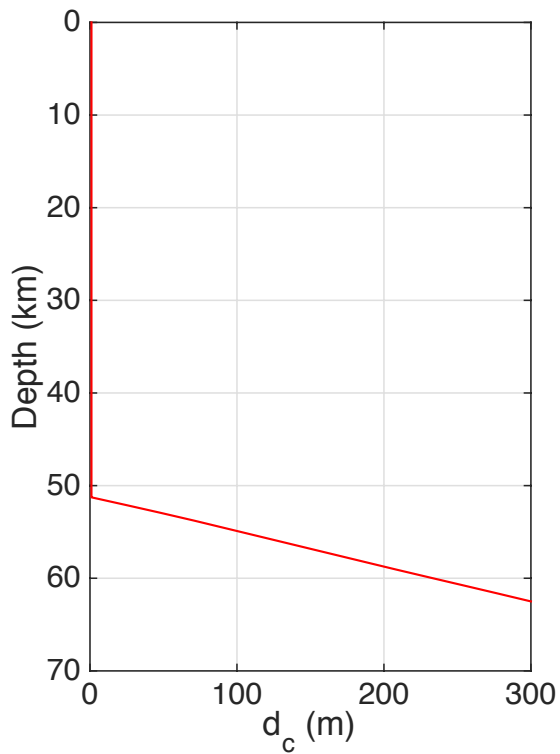

25

26

**Figure S1:** Variation of the slip weakening distance with depth applied in the dynamic simulations.

27

Above 50 km the  $d_c$  has a value of 1m. Depth is given relative to the point at which the fault reaches

28

the surface.

29

30

31

32

33

34

35

36

37

38

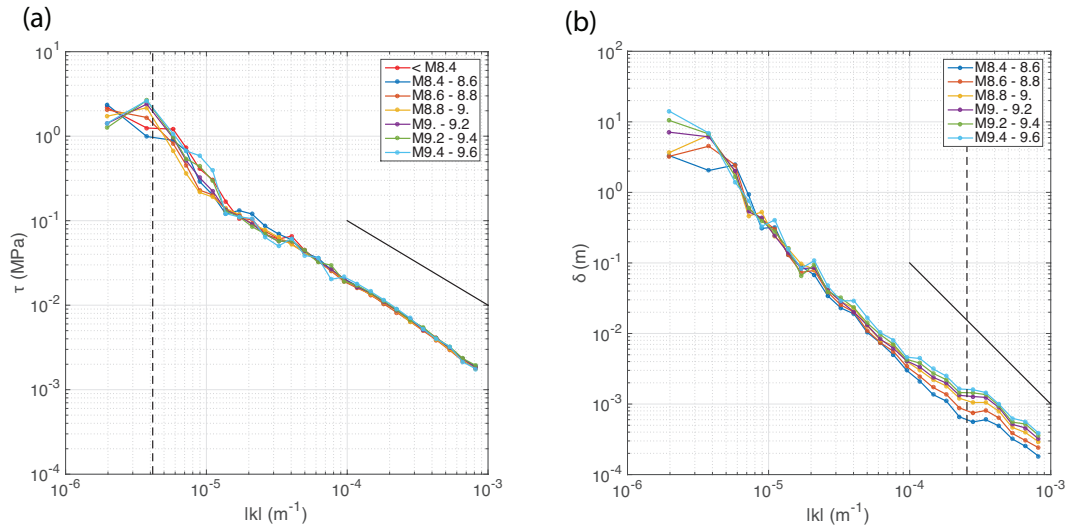

39  
 40  
 41  
 42  
 43  
 44  
 45  
 46  
 47  
 48  
 49  
 50  
 51  
 52  
 53

**Figure S2:** Amplitude spectra for the initial stress (subplot a) and resulting slip (subplot b). In both subplots the distributions have been grouped according to resulting magnitude with the amplitude spectra calculated in wavenumber bins. **a)** the black dashed line represents the length of the fault for which the normal stress is depth invariant (and the scaling the initial shear stress is uniform), the solid black line represents a  $k^{-1}$  slope **b)** the black dash represents the maximum element size with the solid black line representing a  $k^{-2}$  slope.

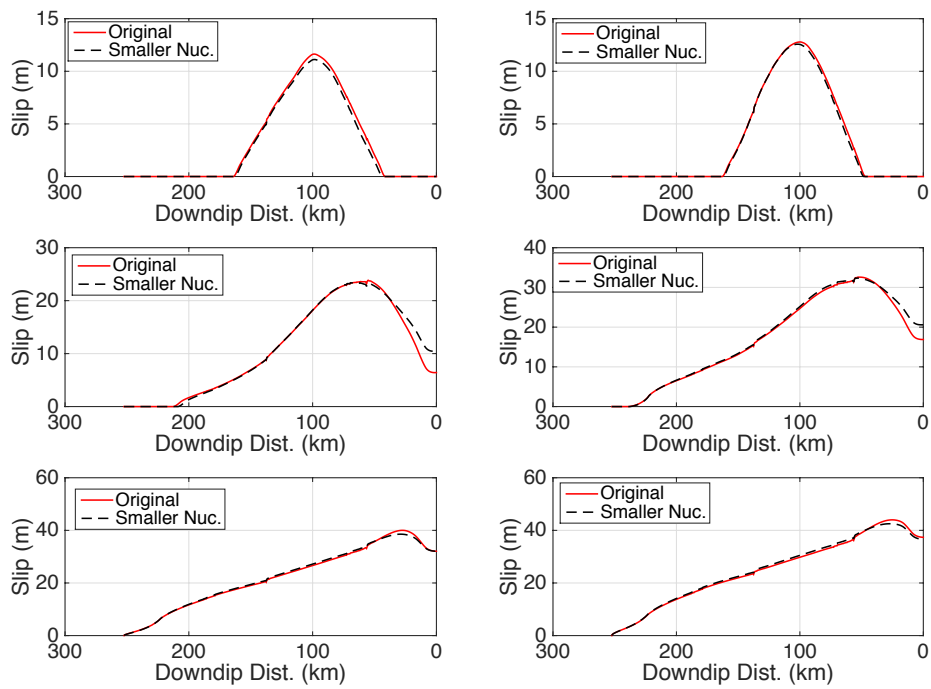

54  
55

**Figure S3:** comparison between slip distributions generated using a nucleation size smaller than in the original model. Taking 35 cases, we used the same initial conditions (i.e. stochastic shear stress distributions), the only difference is that the nucleation zone is halved. Of the 35 comparisons, 8 did not nucleate when the nucleation zone was halved, in the rest, the final slip distributions we similar. A selection of these are presented in this figure where the original slip distribution is represented by a red line an the dashed black line indicates slip in the case where the nucleation zone has been halved.

61  
62  
63  
64  
65  
66  
67  
68  
69  
70  
71  
72

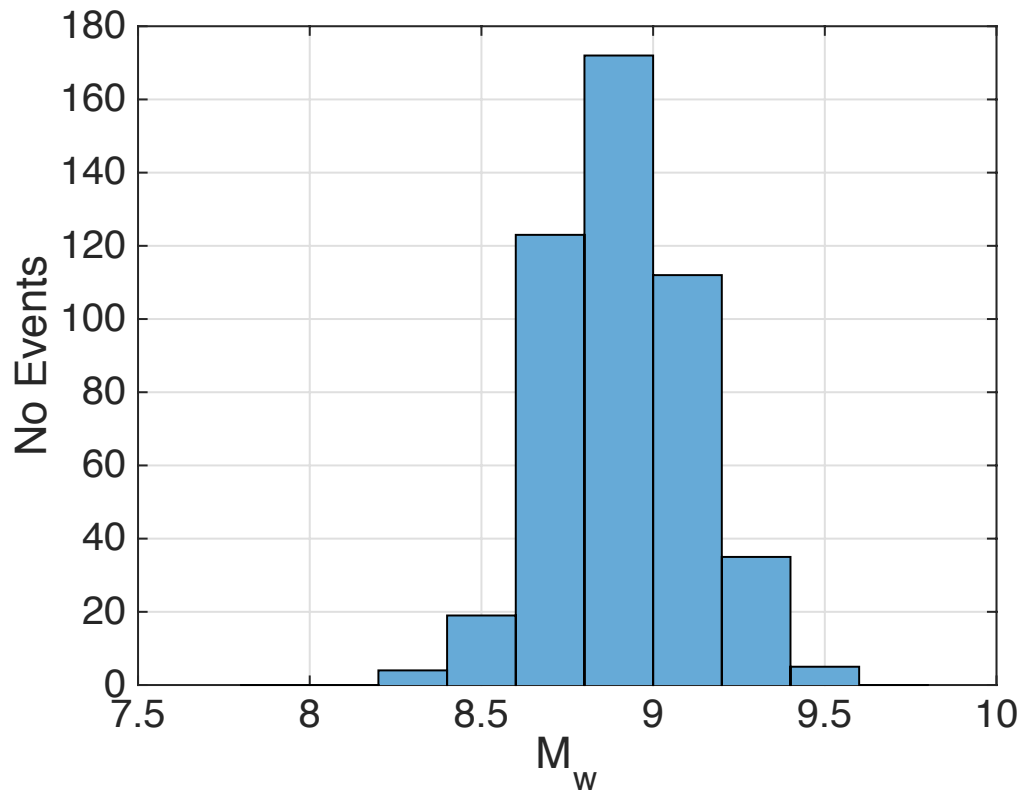

73

74 **Figure S4:** Moment magnitude distribution from dynamic simulations assuming that the length scales  
 75 according to Eqn 3. Bin size are  $0.2 M_w$ , very small events have been excluded (i.e. simulations where  
 76 rupture is controlled by the nucleation patch).

77

78

79

80

81

82

83

84

85

86

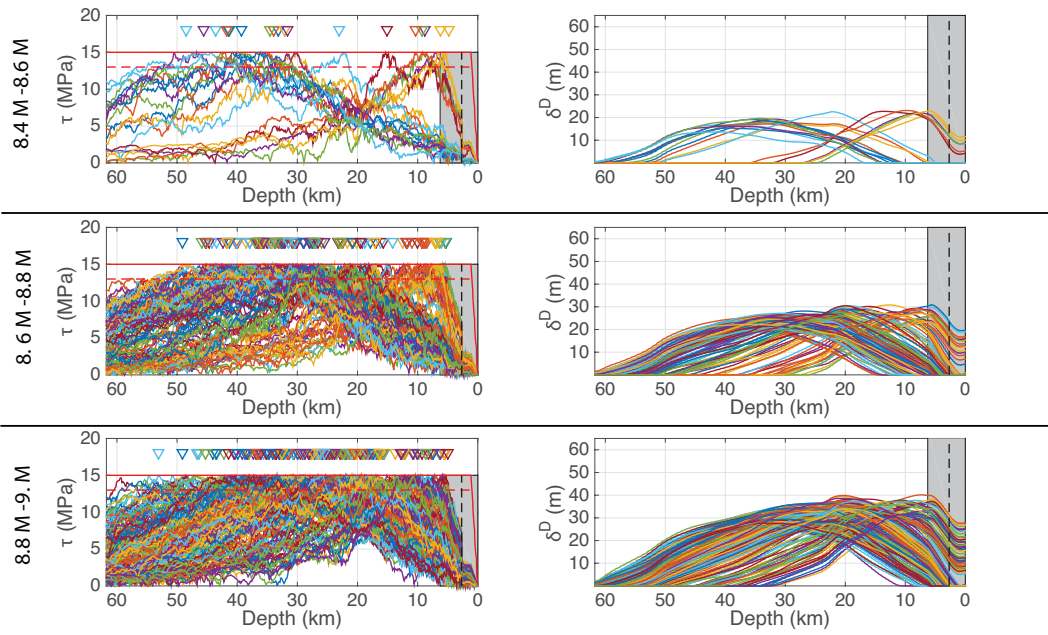

87

88 **Figure S5:** Pre-stress and slip distributions subdivided into the magnitude bins 8.4 – 8.6  $M_w$ ; 8.6 – 8.8  
 89  $M_w$  and 8.8-9.0  $M_w$ . The subplots on the left side represent pre-stress distributions, the different  
 90 coloured lines represent the different initial pre-stress distributions and the red lines are the yield stress  
 91 .The right handside subplots are the resulting slip distributions from the corresponding pre-stress  
 92 distributions on the right hand side. Again each colour represents a different simulation. The solid red  
 93 line is the yield stress the drop in yield stress due to the nucleation patches are not draw in order to  
 94 improve clarity of the initial stress distribution; the amplitude of the drop in the yield stress in the  
 95 nucleation zone is depicted by the dashed line. The triangles represent the location of the nucleation  
 96 zones.

97

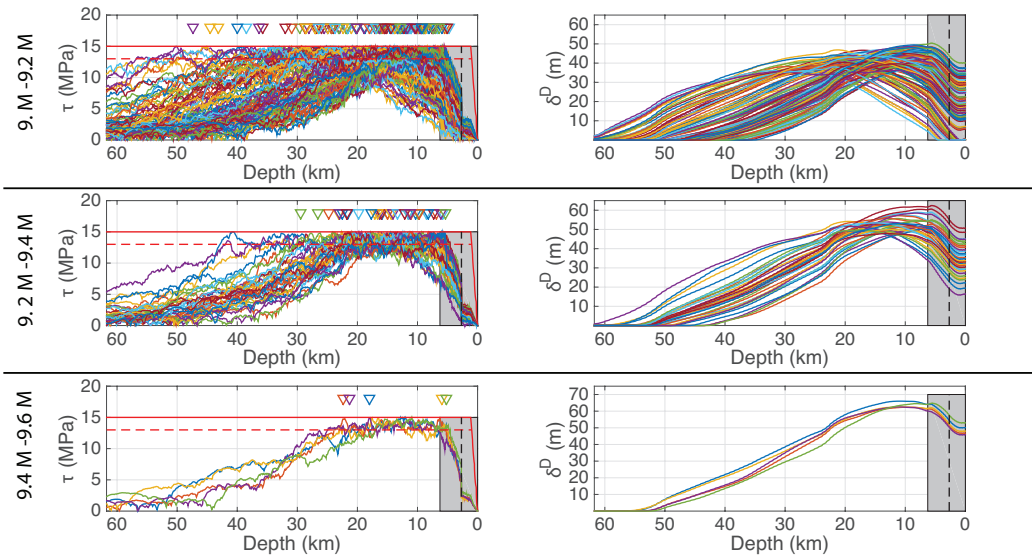

98

99 **Figure S6:** Pre-stress and slip distributions subdivided into the magnitude bins 9.0 – 9.2  $M_w$ ; 9.2 – 9.4  
 100  $M_w$  and 9.4 - 9.6  $M_w$ . The layout and colour code used in the subplots are similar to Fig. S5.

101

102

103

104

105

106

107

108

109

110

111

112

113

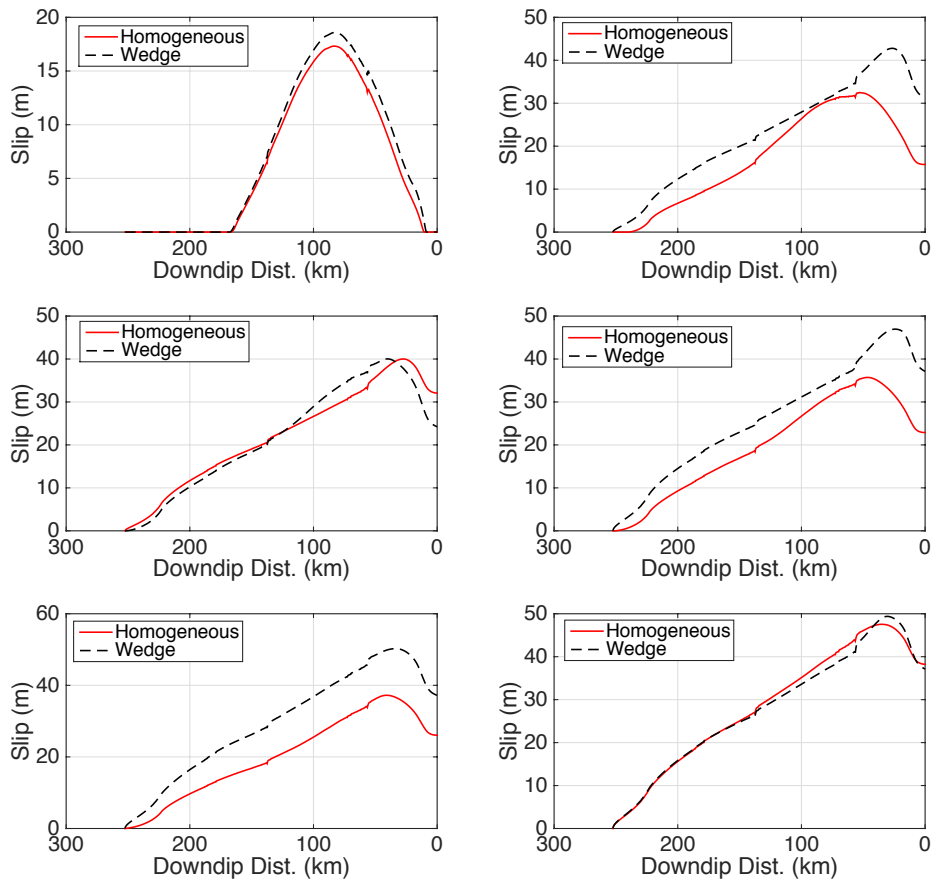

114

115 **Figure S7:** testing the effect of introducing a more compliant wedge ( $v_p = 4.7$  km/s ,  $v_s = 2.1$  km/s ,  $\rho =$   
 116  $2.5$  kg/m<sup>3</sup>) compared to the rest of the medium ( $v_p = 6.3$  km/s,  $v_s = 3.2$  km/s,  $\rho = 3000$  kg/m<sup>3</sup>). 35  
 117 sample case were taken where all other aspects of the model were the same. In general there was little  
 118 alteration for small events (see top left sub-figure). For larger events, the addition of the wedge, on  
 119 average induced larger amounts of slip near the surface, however the general shape of the slip is similar  
 120 in nearly all cases.

121

122

123

124

125



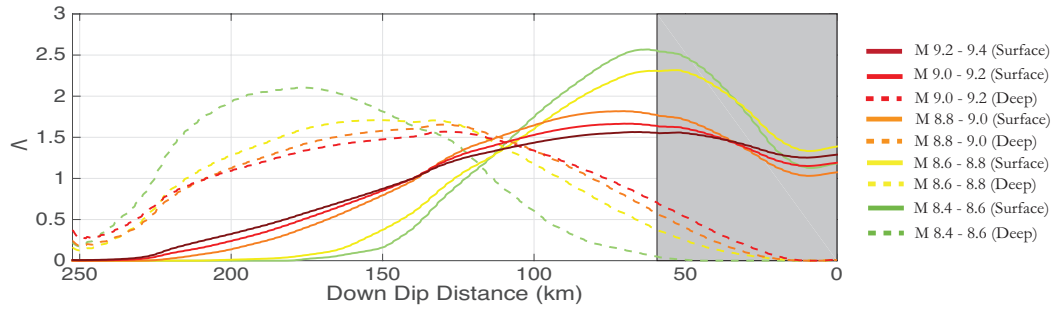

126

127 **Figure S8:** transfer functions for each magnitude bin split depending on if rupture reaches the surface  
 128 (i.e. Surface) or does not (Deep). Choice of whether to use the deep or surface transfer function is  
 129 defined based on the probability of it occurring in the simulations (see Table S1). The M 8.4-8.6 bin  
 130 contains 19 events and therefore its sample size is not representative. The grey box denotes the wedge.

131

132

133

134

135

136

137

138

139

140

141

142

143

144

145

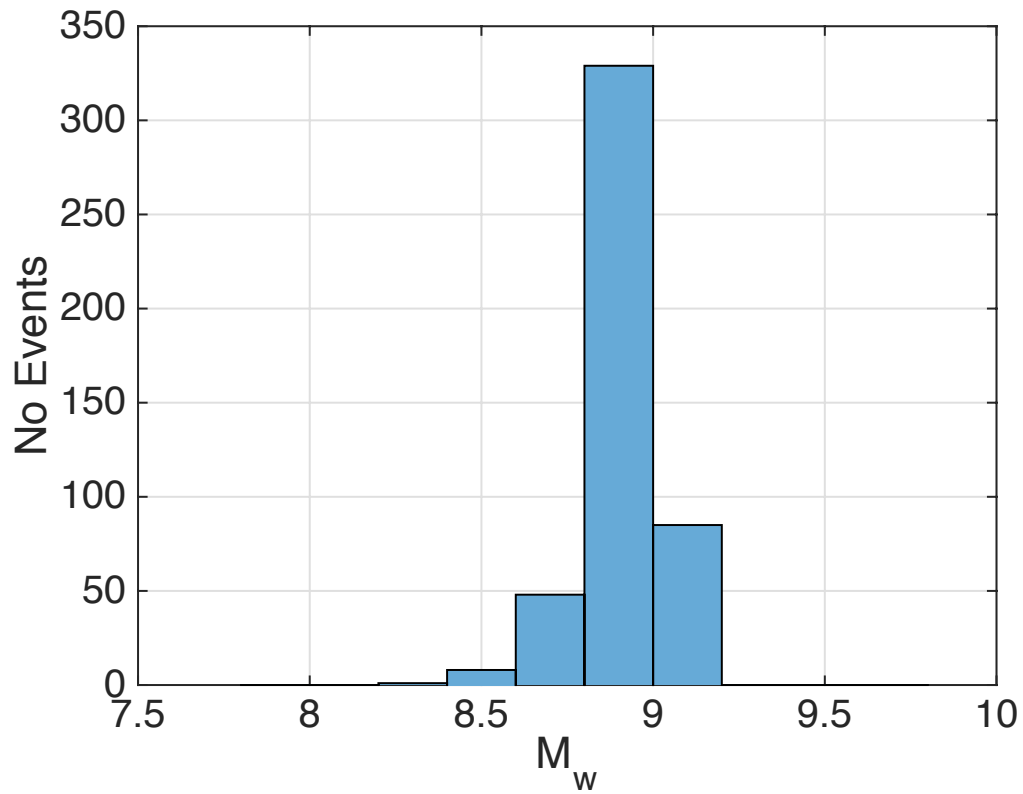

146

147 **Figure S9:** Earthquake magnitude distribution from dynamic simulations assuming that the seismic  
 148 moment is  $M_0 = \mu \bar{\delta} W^2$ . Bin size is  $0.2 M_w$ , and the majority of events range between  $M_w$  8.4-9.2,  
 149 based on this scaling.

150

151

152

153

154

155

156

157

158

159

160

161

162

163

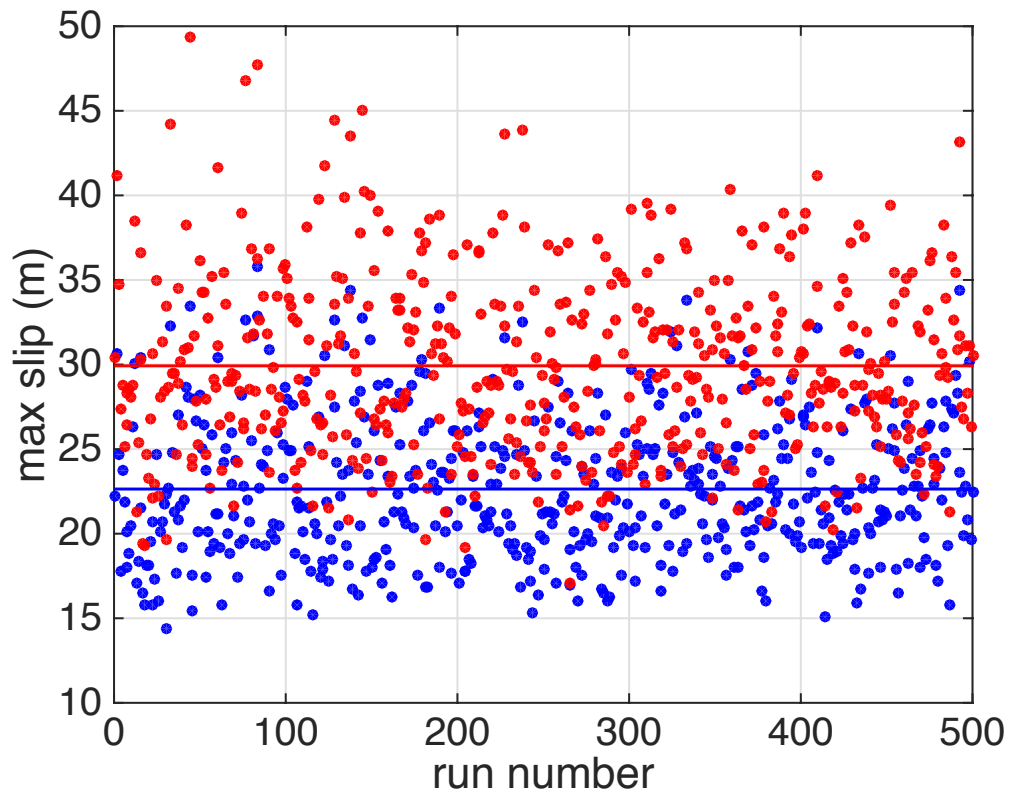

164  
165

**Figure S10:** Comparison of max slip generated in 500 stochastic source simulations. The standard methodology produces a maximum slip (blue dots) range of 14.4 – 35.8 m with a mean of 22.6 m (solid blue line) applying the transfer function shifts the maximum slip range to 17.9 – 49.4 m with a mean of 30. m (solid red line). All slip distributions produce  $M_w$  9 events and have been used to generate  $H_{\max}$  in Fig. 8 in the main text.

166  
167  
168  
169  
170  
171  
172

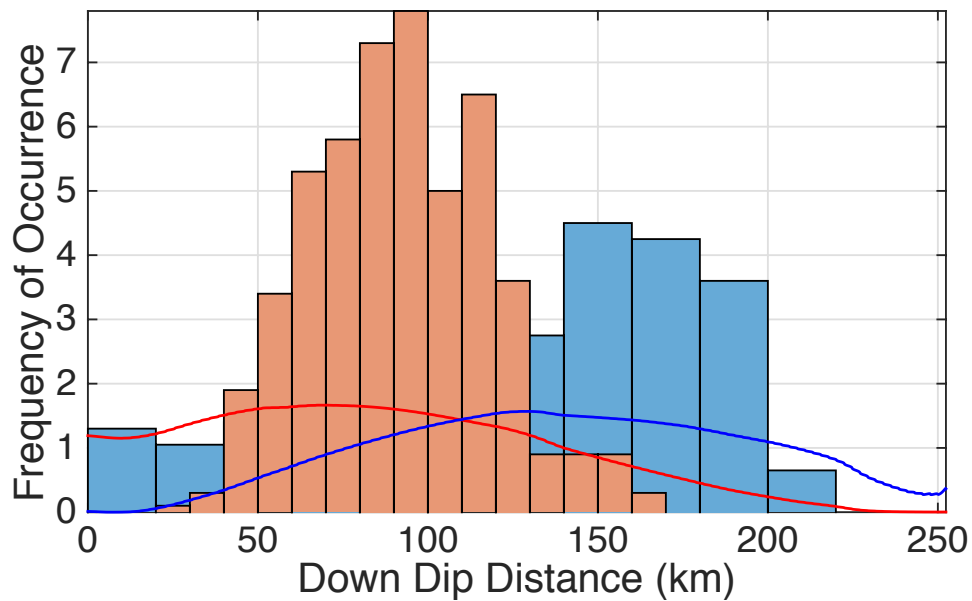

173

174 **Figure S11:** Histograms of the location of the maximum slip in the stochastic models discussed in Fig.

175 S6 and Figure 8 in main text. The traditional stochastic source model produces a relatively even

176 distribution with depth, featuring a slightly higher frequency of occurrence at depth relative to near the

177 surface (blue histogram). With the application of the transfer function the maximum slip is shifted

178 towards the surface (orange histogram). The red line represents the applied transfer function in the case

179 where rupture reaches the surface, the blue is the transfer function when rupture does not reach the

180 surface both transfer functions were generated using the slip distributions in the  $M_w$  9 - 9.2 bin. The

181 choice of which transfer function to use is based on the probability of surface rupture occurring in the

182  $M_w$  9 - 9.2 bin, in this case 82.1 % of the ruptures reached the surface therefore a probability function

183 of 0.821 to 0.178 was used in choosing between the surface transfer function and the deep rupture

184 transfer function .

185

186

187

188

189

190

191

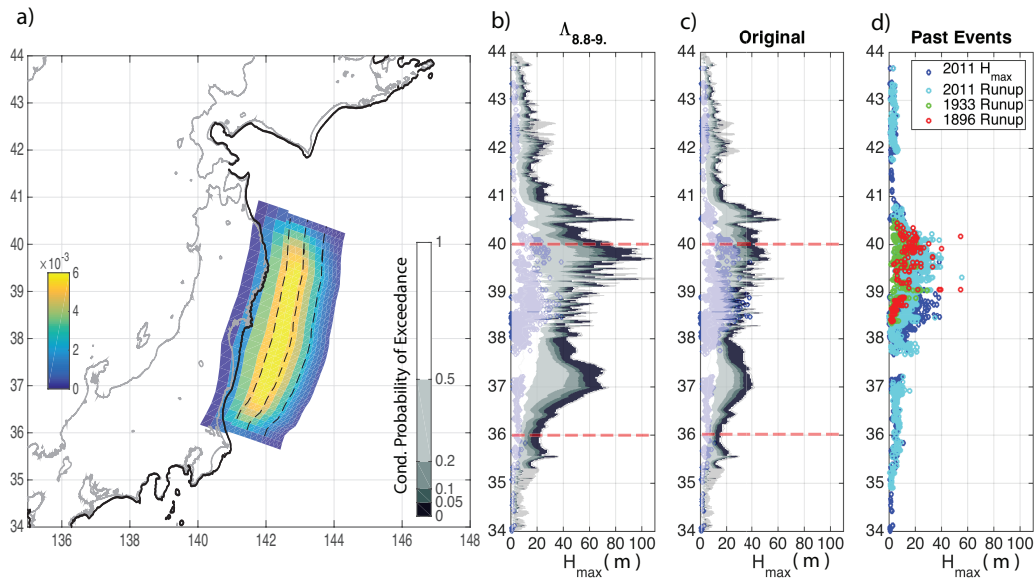

192

193 **Figure S12:** The effect of using the  $M_w$  8.8-9.0 transfer function for a  $M$  9 event of calculating  $H_{max}$

194 hazard. **a)** Location of the fault (the subduction zone interface) relative to the Japanese coastline and

195 receiver locations (denoted by black dots). Colours on the fault plane are the SPDF for the modified

196 stochastic source model using the  $M_w$  8.8-9.0 transfer function. Dashed lines across the fault plane

197 mark 50 km, 100 km, 150 km down dip distance from the top of the fault. Bold black line denotes

198 tsunami receiver locations (see Methods). **b)** Conditional probability of exceedance of maximum wave

199 height along latitude, for the modified source model using the  $M_w$  8.8-9.0 transfer function for a  $M$  9

200 event; and **c)** original stochastic source model, again for a  $M$  9 earthquake. The logarithmic colour

201 scale is the same for both plots. The grey solid lines indicate the maximum and minimum  $H_{max}$  obtained

202 at each receiver. Blue diamonds are maximum tsunami wave height observed during the 2011  $M_w$  9

203 earthquake, as in panel d. **d)** observed maximum wave height and runup for 2011  $M_w$  9 Tohoku

204 earthquake, the 1896  $M_s$  7.2 and 1933  $M_s$  8.5 Sanriku earthquakes as described in Figure 7 in main text.

205

206

207

208

209

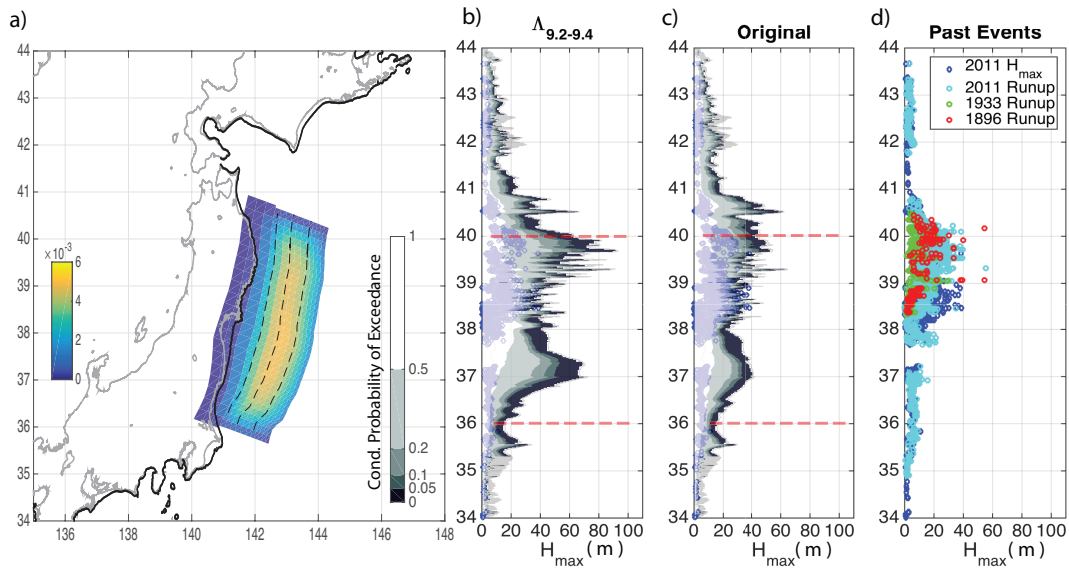

210

211 **Figure S13:** The effect of using the  $M_w$  9.2-9.4 transfer function for a  $M$  9 event of calculating  $H_{max}$

212 hazard. **a)** Location of the fault (the subduction zone interface) relative to the Japanese coastline and

213 receiver locations (denoted by black dots). Colours on the fault plane are the SPDF for the modified

214 stochastic source model using the  $M_w$  9.2-9.4 transfer function. Dashed lines across the fault plane

215 mark 50 km, 100 km, 150 km down dip distance from the top of the fault. Bold black line denotes

216 tsunami receiver locations (see Methods). **b)** Conditional probability of exceedance of maximum wave

217 height along latitude, for the modified source model using the  $M_w$  9.2-9.4 transfer function for a  $M$  9

218 event; and **c)** original stochastic source model, again for a  $M$  9 earthquake. The logarithmic colour

219 scale is the same for both plots. The grey solid lines indicate the maximum and minimum  $H_{max}$  obtained

220 at each receiver. Blue diamonds are maximum tsunami wave height observed during the 2011  $M_w$  9

221 earthquake, as in panel d. **d)** observed maximum wave height and runup for 2011  $M_w$  9 Tohoku

222 earthquake, the 1896  $M_s$  7.2 and 1933  $M_s$  8.5 Sanriku earthquakes as described in Figure 7 in main text.

223

224

225

226

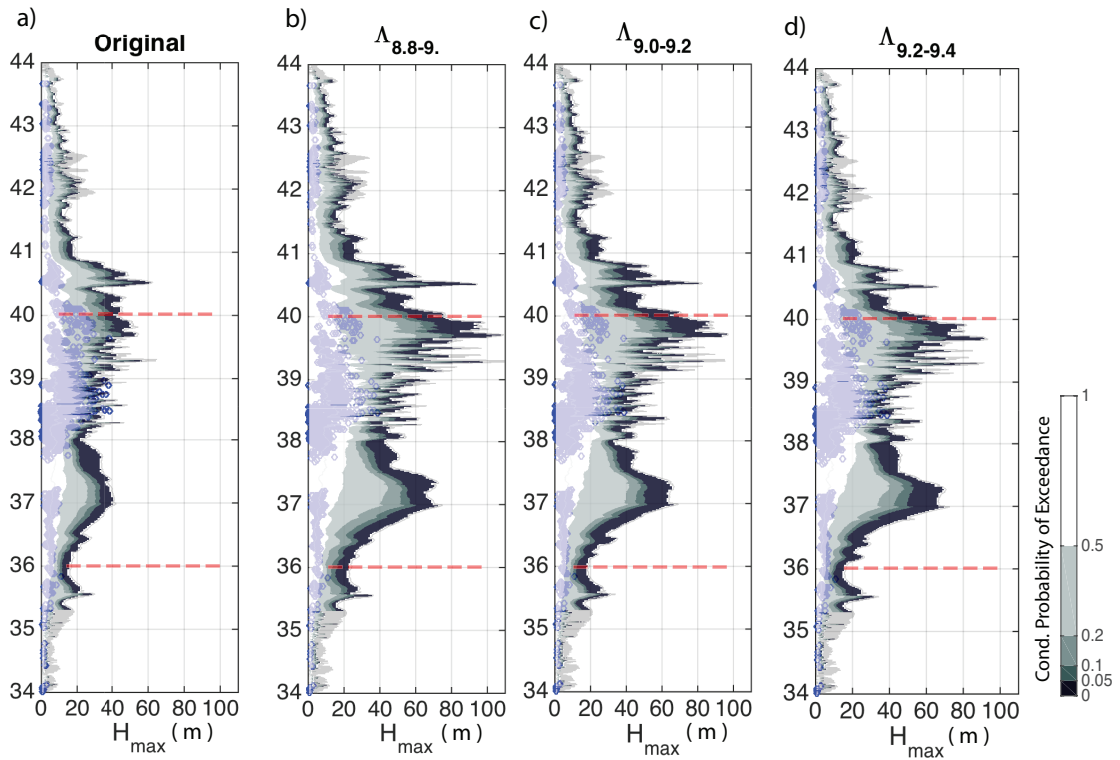

227

228 **Figure S14:** comparison of conditional probability of exceedance for  $H_{\max}$  created using different

229 tranfer functions (see Figures 7, S12, S13)

230

231

232

233

234

235

236

237

238

239

240

241

242

243

244

| Magnitude Bin | Probability of surface rupture | Probability of deep rupture |
|---------------|--------------------------------|-----------------------------|
| 8.6 - 8.8     | 0.13                           | 0.84                        |
| 8.8 – 9.0     | 0.279                          | 0.721                       |
| 9.0 – 9.2     | 0.821                          | 0.179                       |
| 9.2 – 9.4     | 1                              | 0                           |

245 Table S1: probability of rupture reaching the surface compared to earthquakes that do not.

246 The probabilities are based on the slip distributions produced in the dynamic rupture

247 simulations. With increasing magnitude there is a consistent trend of increasing likelihood of

248 surface rupture with increasing rupture. The 8.4 M- 8.6 M bin has been omitted as it only

249 contained 19 events which is not enough to produce a representative result.

250
